# Supplementary material
Source: PubMed Central journal article supplement (PMC3207409)
Supplement: supp_M111.240150_jbc.M111.240150-1.pdf [file supp_M111.240150_jbc.M111.240150-1.pdf]

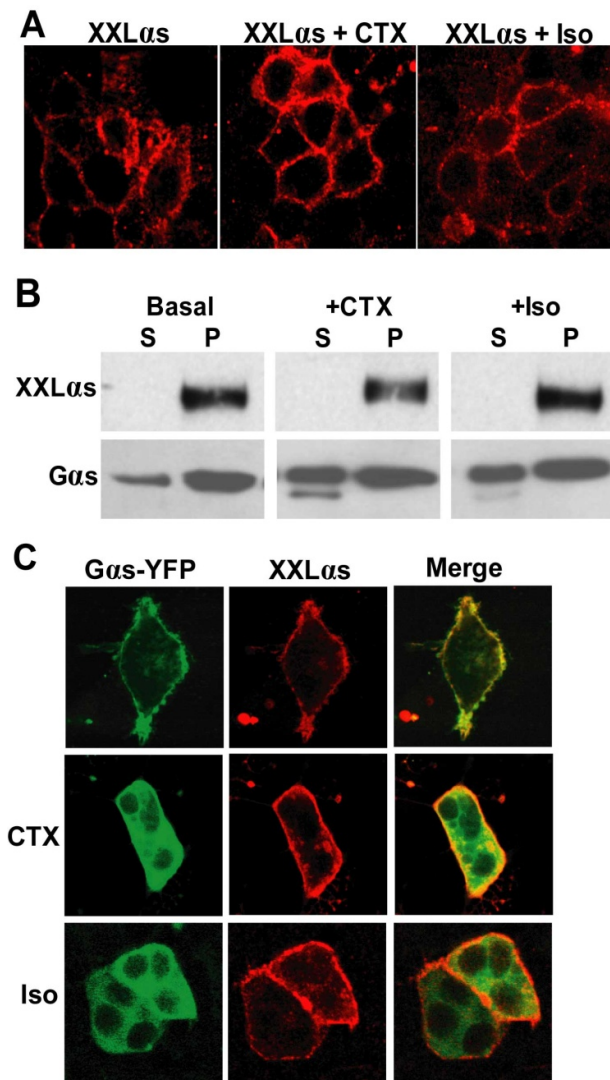

Fig- S1.

**Supplemental Figure 1. XXL $\alpha$ s are targeted differently from wild-type G $\alpha$ s upon activation.**

A-B: HEK293 cells were transiently transfected with cDNA encoding either HA-tagged G $\alpha$ s or XXL $\alpha$ s. Forty-eight hours after transfection, cells were treated with  $10^{-5}$  M isoproterenol for 20 min, or with  $1\mu\text{g/ml}$  Cholera toxin (CTX) for four hours, and subcellular localization of G $\alpha$ s and XXL $\alpha$ s were examined by immunocytochemical (IC) analysis by using the anti-HA antibody (A), and Western blot analysis by using the anti-HA antibody (B). C: HEK293 cells were transiently co-transfected with cDNA encoding HA-tagged XXL $\alpha$ s and G $\alpha$ s-YFP. Forty-eight hours after transfection, cells were treated with  $10^{-5}$  M isoproterenol (iso) for 20 min or with  $1\mu\text{g/ml}$  Cholera toxin (CTX) for four hours, and subcellular localization of XXL $\alpha$ s were examined by immunocytochemical (IC) analysis by using the anti-HA antibody (Red), and G $\alpha$ s-YFP was visualized by green fluorescence directly through a confocal microscope.

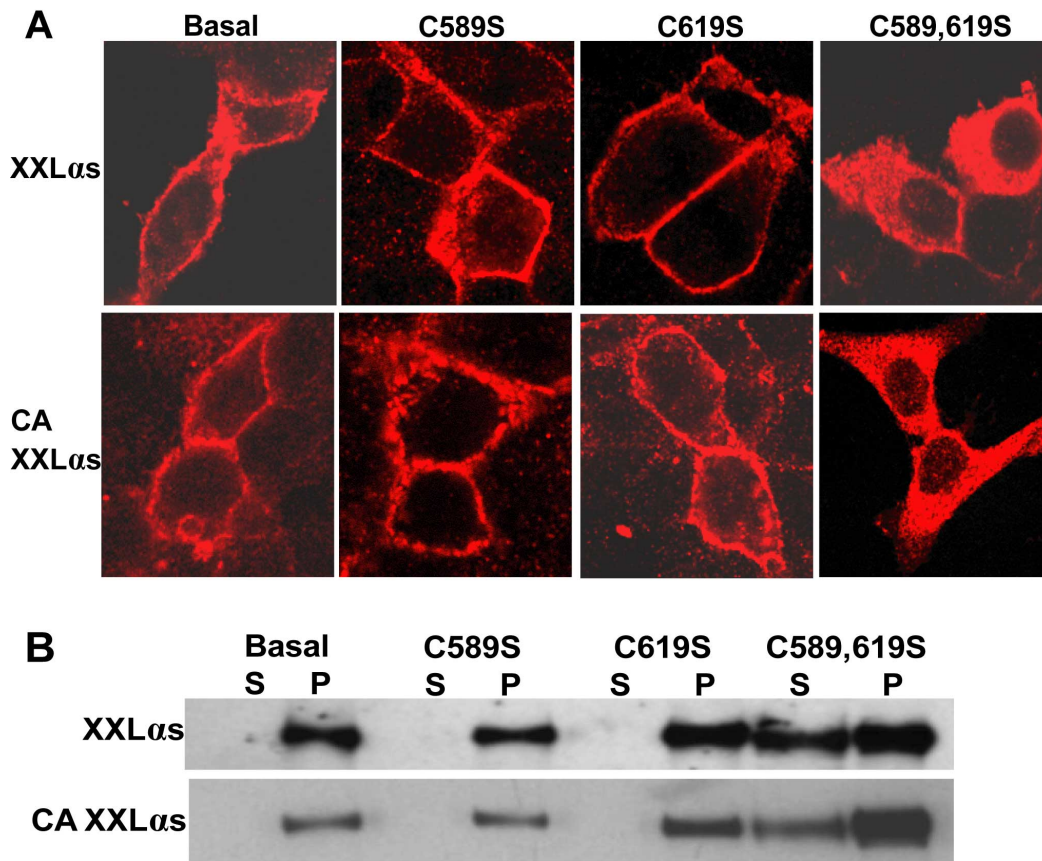

Fig- S2.

**Supplemental Figure 2. Substitution of conserved cysteine residues in the XL domain and inhibition of protein palmitoylation disrupts plasma membrane targeting at the steady state.**

A: Immunocytochemical analysis of subcellular distribution for wild-type and Cys-to-Ser mutants of XXL $\alpha$ s in HEK293 cells by using the anti-HA antibody. Expression constructs encoding the wild-type or Cys-to-Ser mutants of XXL $\alpha$ s (C589, C619) were transiently transfected into HEK cells. Forty eight hours after transfection, the subcellular localization of these HA-tagged recombinant XXL $\alpha$ s were investigated. CA, constitutively active form carrying GTPase inhibiting mutation analogous to R201H. B: Western blots using the anti-G $\alpha$  C-terminal antibody performed for determining the subcellular localizations of Cys-to-Ser mutants of XXL $\alpha$ s in HEK293 cells. S, soluble fraction; P, particular fraction.
